# Supplementary material for: Synthesis and photoluminescence properties of hybrid 1D core–shell structured nanocomposites based on ZnO/polydopamine
Source: Royal Society of Chemistry journal article supplement (doi:10.1039/d0ra04829a), 2020-01-01
Supplement: d0ra04829a1.pdf [file d0ra04829a1.pdf]

**Table S1.** Peak positions of deconvoluted ZnO and ZnO-PDA PL spectra and power coefficient values

| Peak position, eV | P1         | P2         | P3          | P4          |
|-------------------|------------|------------|-------------|-------------|
| ZnO               | 2.08±0.104 | 3.28±0.164 | 3.34±0.167  | 3.367±0.168 |
| k                 | 0.53±0.026 | 1.45±0.072 | 1.44±0.072  | 1.33±0.066  |
| ZnO-PDA           | 2.05±0.102 | 3.27±0.163 | 3.348±0.167 | 3.368±0.168 |
| k                 | 0.4±0.02   | 1.07±0.053 | 1.42±0.071  | 1.27±0.063  |

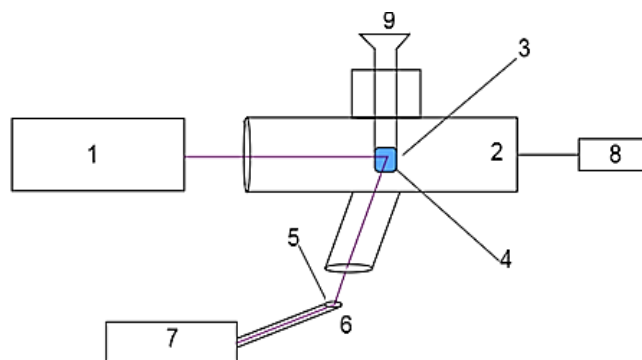

**Figure S1** - Schematic of PL low temperature Set-up. Labels show: 1 - laser, 2 – vacuum chamber, 3 – sample holder, 4 – sample, 5 – quartz lens, 6 – optical fiber, 7 – spectrometer, 8 – vacuum pump, 9 – temperature controller
